# Supplementary material for: Prolonged breastfeeding protects from obesity by hypothalamic action of hepatic FGF21
Source: PubMed Central journal article supplement (PMC9314260; doi:10.1038/s42255-022-00602-z), 2022-07-25
Supplement: 42255_2022_602_MOESM1_ESM.pdf [file 42255_2022_602_MOESM1_ESM.pdf]

**Supplementary information**

---

**Prolonged breastfeeding protects from obesity by hypothalamic action of hepatic FGF21**

---

In the format provided by the authors and unedited

**Supplementary table 1.** Antibodies used for western blot.

| <b>Antibody</b>    | <b>Dilution</b> | <b>Vendor</b>             | <b>Catalog number</b> | <b>RRID</b> |
|--------------------|-----------------|---------------------------|-----------------------|-------------|
| Anti-pSTAT3        | 1:1000          | Cell Signaling Technology | 9134                  | AB_331589   |
| Anti-STAT3         | 1:1000          | Cell Signaling Technology | 4904                  | AB_331269   |
| Anti-pPI3K         | 1:1000          | Cell Signaling Technology | 4228                  | AB_659940   |
| Anti-PI3K          | 1:1000          | Cell Signaling Technology | 4292                  | AB_329869   |
| Anti-pAKT          | 1:1000          | Cell Signaling Technology | 9271                  | AB_329825   |
| Anti-AKT           | 1:1000          | Cell Signaling Technology | 9272                  | AB_329827   |
| Anti-pERK          | 1:1000          | Cell Signaling Technology | 4370                  | AB_2315112  |
| Anti-ERK           | 1:1000          | Cell Signaling Technology | 9102                  | AB_330744   |
| Anti-PPAR $\gamma$ | 1:1000          | Abcam                     | ab27649               | AB_777390   |
| PGC1 $\alpha$      | 1:1000          | Abcam                     | ab54481               | AB_881987   |
| UCP1               | 1:1000          | Abcam                     | ab10983               | AB_2241462  |
| pHSL               | 1:1000          | Cell Signaling Technology | 4126                  | AB_490997   |
| HSL                | 1:1000          | Abcam                     | ab45422               | AB_2135367  |
| FGF21              | 1:1000          | Abcam                     | ab64857               | AB_2104485  |
| D2R                | 1:1000          | Abcam                     | ab85367               | AB_10674739 |
| $\beta$ -ACTIN     | 1:5000          | Sigma-Aldrich             | A5316                 | AB_476743   |

|                  |         |                                |             |             |
|------------------|---------|--------------------------------|-------------|-------------|
| OX A/B           | 1:1000  | Santa Cruz Biotechnology       | sc-28935    | AB_784981   |
| Goat Anti-rabbit | 1:5000  | Jackson ImmunoResearch<br>Labs | 111-035-003 | AB_2313567  |
| Goat Anti-mouse  | 1:10000 | Jackson ImmunoResearch<br>Labs | 115-035-003 | AB_10015289 |
