# Supplementary material for: Prolonged breastfeeding protects from obesity by hypothalamic action of hepatic FGF21
Source: PubMed Central journal article supplement (PMC9314260; doi:10.1038/s42255-022-00602-z), 2022-07-25

## Supplementary Figure 5

### Uncropped blots Figure 6c

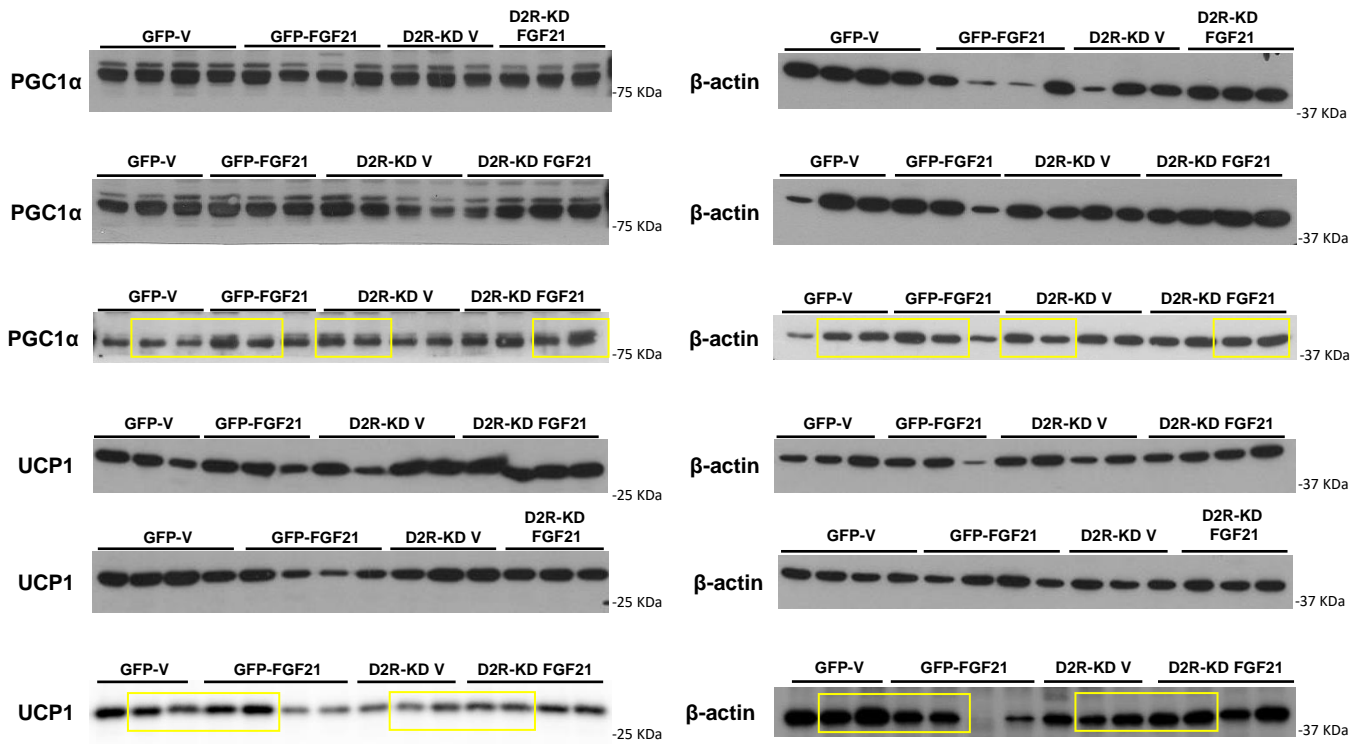

### Uncropped blots Figure 6j

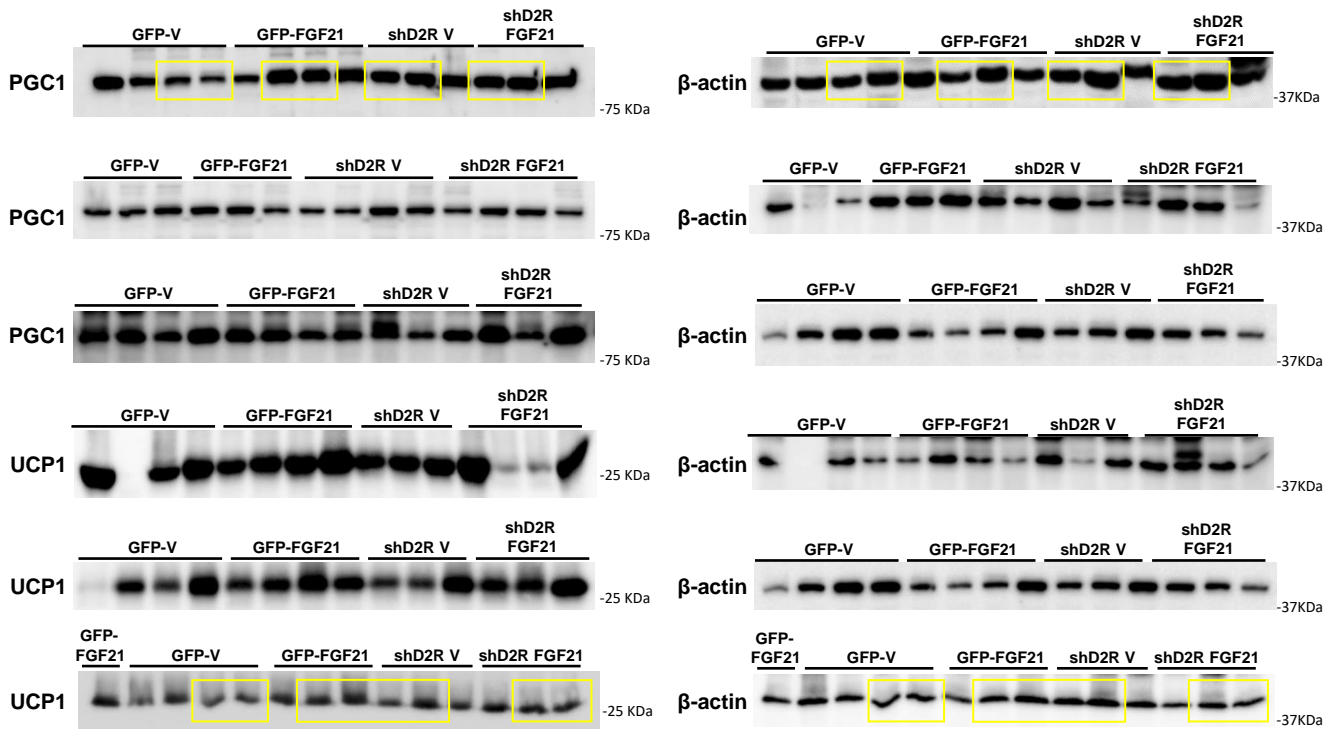

Supplement: 42255_2022_602_MOESM13_ESM.pdf [file 42255_2022_602_MOESM13_ESM.pdf]
