# Supplementary material for: Prolonged breastfeeding protects from obesity by hypothalamic action of hepatic FGF21
Source: PubMed Central journal article supplement (PMC9314260; doi:10.1038/s42255-022-00602-z), 2022-07-25

# Supplementary Figure 8

## Uncropped blots Extended Data Figure 3c

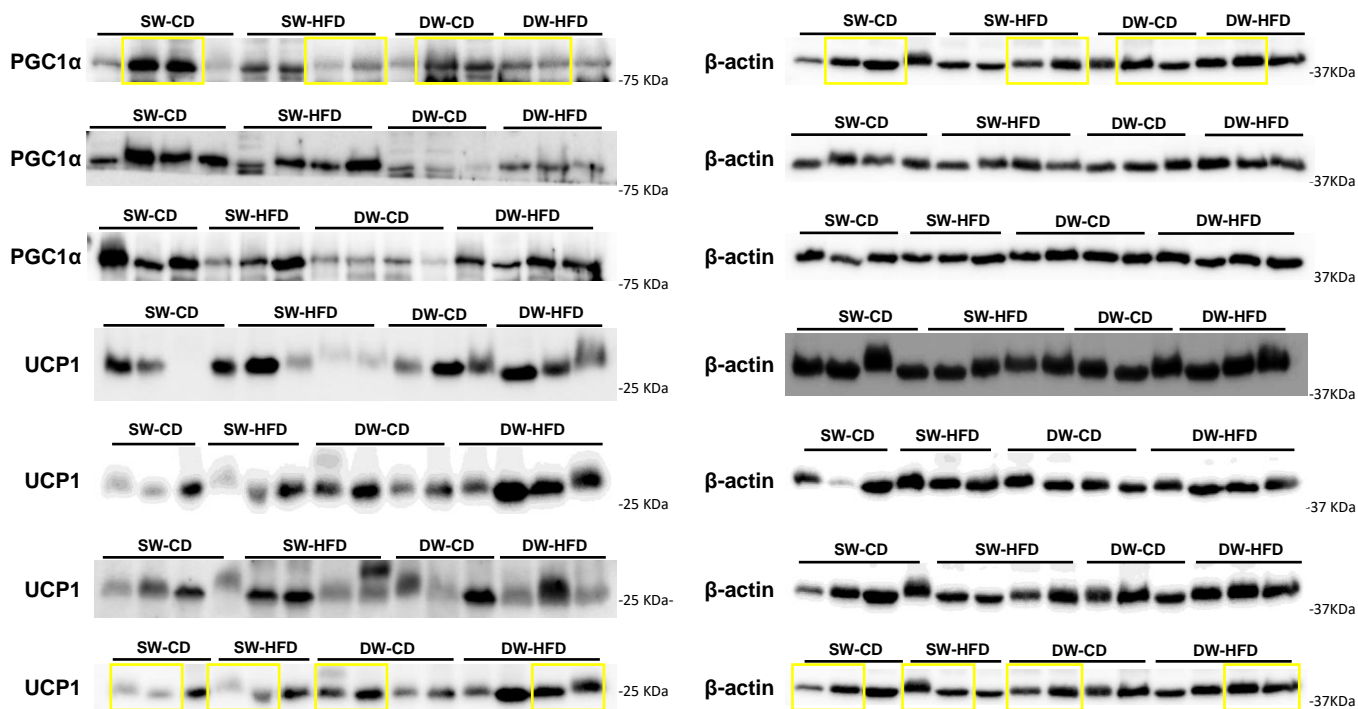

## Uncropped blots Extended Data Figure 3d

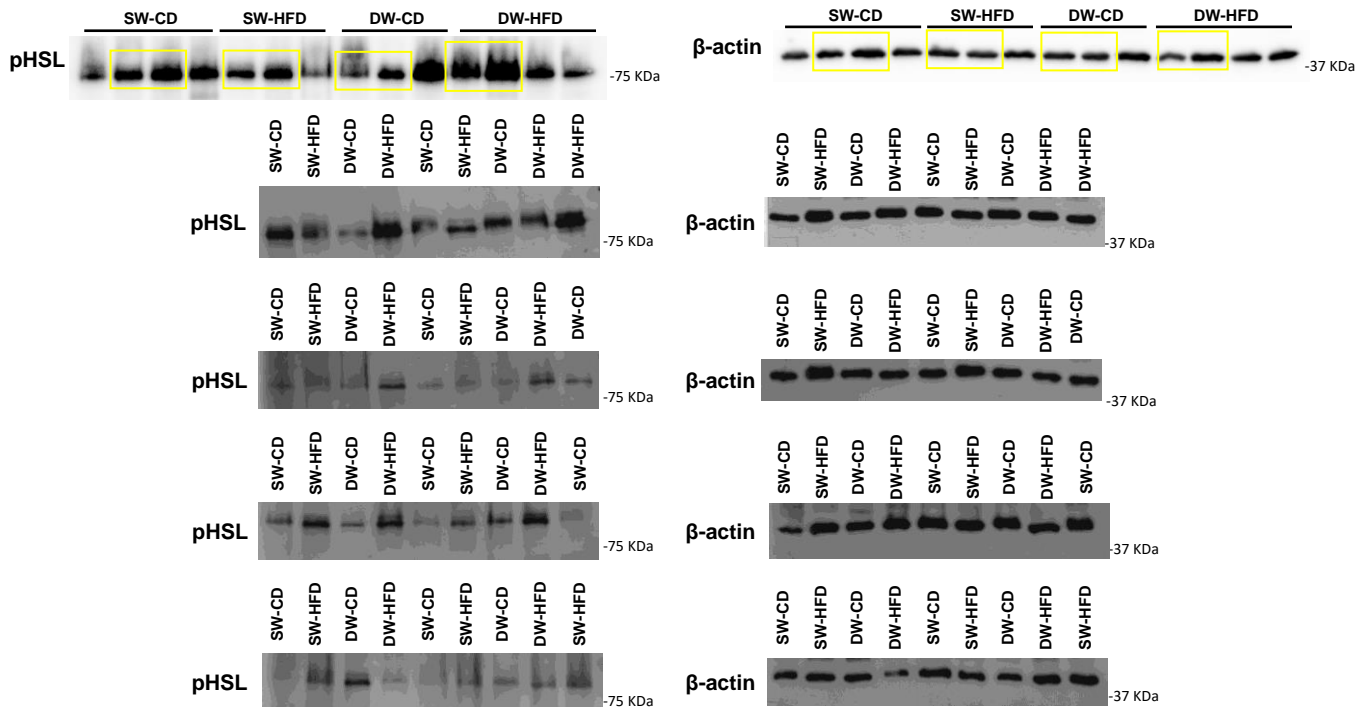

# Uncropped blots Extended Data Figure 3d

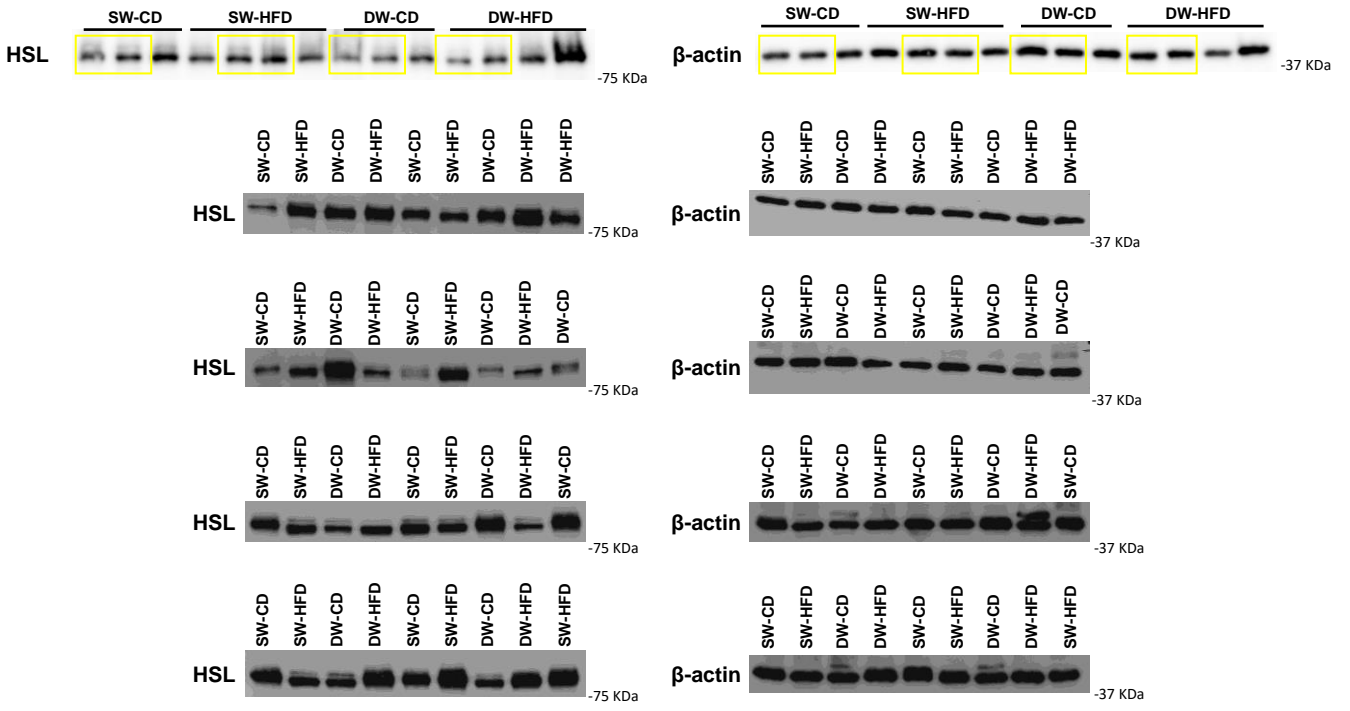

Supplement: 42255_2022_602_MOESM21_ESM.pdf [file 42255_2022_602_MOESM21_ESM.pdf]
